# Supplementary material
Source: publisher figshare collection journal article supplement (https://acs.figshare.com/ndownloader/files/14011787)
Supplement: Supplementary file 1 [file 14011787]

# FTDP-17 mutations alter the aggregation and microtubule stabilization propensity of tau in an isoform-specific fashion

Yamini Mutreja<sup>†</sup>, Benjamin Combs<sup>†‡</sup>, and T. Chris Gamblin<sup>\*†</sup>

<sup>†</sup>Department of Molecular Biosciences, University of Kansas, 1200 Sunnyside Ave, Lawrence,  
KS 66045, United States

<sup>‡</sup>Department of Translational Science & Molecular Medicine, College of Human Medicine,  
Michigan State University, Grand Rapids, MI 49503, United States

\*Corresponding author: e-mail address: [gamblin@ku.edu](mailto:gamblin@ku.edu)

## Supporting Information

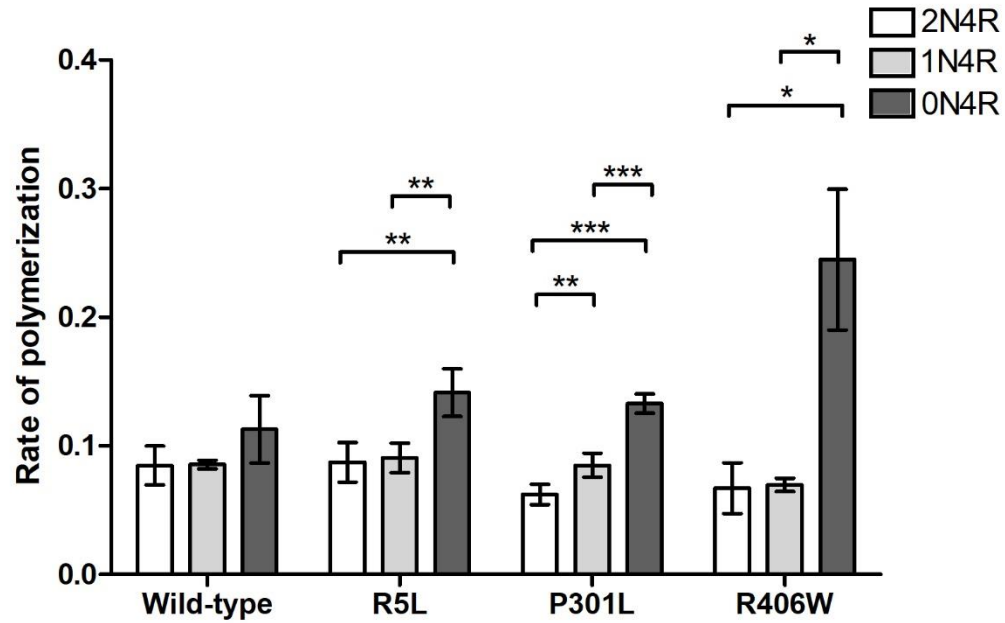

**Figure S1:** Comparison of kinetics of ARA-induced aggregation between isoforms. The rate of polymerization ( $k_{app}$ ) for 2N4R (white), 1N4R (medium gray) and 0N4R (dark gray) isoforms is grouped by wild-type, R5L, P301L, and R406W on the x-axis. The data were compared using one way ANOVA with Newman-Keuls multiple comparison tests. Asterisks represent the level of significance of difference between values. (\*,  $p < 0.05$ ; \*\*,  $p < 0.01$ ; \*\*\*,  $p < 0.001$ ).

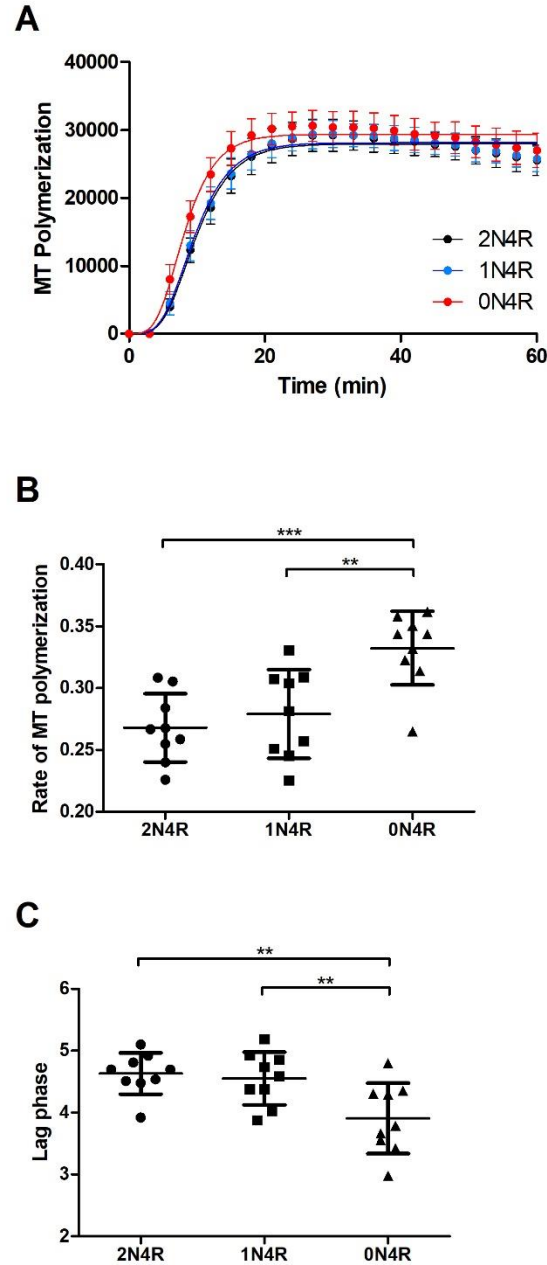

**Figure S2:** *MT assembly by wild-type 4R tau isoforms.* Data from nine replicates for wild-type proteins were pooled together for comparison. A) The average fluorescence values in the presence of tubulin and 2N4R (black), 1N4R (blue), and 0N4R (red) isoforms  $\pm$  s.d. The curves were fit to the Gompertz growth curve and the calculated values for B) the rate of polymerization ( $k_{app}$ ) and C) the estimated lag time. The data were compared using one way ANOVA with Newman-Keuls multiple comparison tests. Asterisks represent the level of significance of difference between values. (\*,  $p < 0.05$ ; \*\*,  $p < 0.01$ ; \*\*\*,  $p < 0.001$ ).
